# Supplementary material for: Triazine-dibenzofuran-based n-type host materials for high-efficiency and long-lifetime green phosphorescent organic light-emitting diodes
Source: Royal Society of Chemistry journal article supplement (doi:10.1039/d1tc01369f), 2021-01-01
Supplement: d1tc01369f1.pdf [file d1tc01369f1.pdf]

## Supporting Information

### **Triazine-dibenzofuran-Based n-Type Host Materials for High-Efficiency and Long-Lifetime Green Phosphorescent Organic Light-Emitting Diodes**

*Dong Jun Kim,<sup>a,b,†</sup> Sunhee Lee,<sup>c,†</sup> Yong Hui Lee,<sup>b</sup> Hyungkeun Jang,<sup>b</sup> Kwang-Hyun Ahn,<sup>a</sup> and Won-Sik Han<sup>c,\*</sup>*

<sup>a</sup>Department of Applied Chemistry, Kyung Hee University, Yongin, Gyeonggi 17104, Republic of Korea.

<sup>b</sup>LT Materials Co., Yongin, Gyeonggi 17118, Republic of Korea.

<sup>c</sup>Department of Chemistry, Seoul Women's University, Seoul 01797, Republic of Korea. Email: wshan@swu.ac.kr

<sup>†</sup>These authors contributed equally to this work.

|                                                                                               |       |    |
|-----------------------------------------------------------------------------------------------|-------|----|
| Synthesis and Characterisation                                                                | ..... | S2 |
| <b>Figure S1.</b> Optimised structures and dihedral angles for <b>DBT1–DBT4</b>               | ..... | S5 |
| <b>Figure S2.</b> Photoluminescence spectra of <b>DBT1-DBT4</b> in film state                 | ..... | S5 |
| <b>Figure S3.</b> Photoluminescence spectra at 77 K of <b>DBT1-DBT4</b>                       | ..... | S6 |
| <b>Figure S4.</b> CV curves of <b>DBT1-DBT4</b>                                               | ..... | S6 |
| <b>Table S1.</b> Photophysical properties of the materials used in device                     | ..... | S7 |
| <b>Figure S5.</b> Electrical measurements on single-carrier devices.                          | ..... | S7 |
| <b>Figure S6.</b> Device performance of <b>control device</b> .                               | ..... | S8 |
| <b>Figure S7.</b> Comparison of device performances of <b>DBT4-III with and without CPL</b> . | ..... | S9 |

## Synthesis and Characterisations

### 2-(biphenyl-4-yl)-4,6-bis(dibenzo[*b,d*]furan-1-yl)-1,3,5-triazine (DBT1)

2-([1,1'-biphenyl]-4-yl)-4,6-dichloro-1,3,5-triazine (7.0 g, 23.2 mmol), dibenzo[*b,d*]furan-1-ylboronic acid (20.5 g, 69.6 mmol), Pd(PPh<sub>3</sub>)<sub>4</sub> (1.4 g, 1.2 mmol), K<sub>2</sub>CO<sub>3</sub> (9.6 g, 69.6 mmol) were dissolved in 1,4-dioxane/H<sub>2</sub>O (100 mL/20 mL) in a 250-mL single-neck round-bottom flask. The mixture was stirred at reflux for 24 h and cooled to room temperature. This was followed by filtration, and subsequently the crude product was purified by recrystallisation, to obtain **DBT1** as a white powder (10.1 g, yield: 77 %). <sup>1</sup>H NMR (300 MHz, CDCl<sub>3</sub>, δ): 8.90 (d, 2H, *J* = 8.7 Hz), 8.73 (dd, 2H, *J* = 8.1 and 0.6 Hz), 8.52 (dd, 2H, *J* = 7.8 and 1.2 Hz), 7.85 (t, 4H, *J* = 9.1 Hz), 7.74 (d, 2H, *J* = 7.7 Hz), 7.67 (t, 4H, *J* = 8.0 Hz), 7.54–7.48 (m, 4H), 7.44 (d, 1H, *J* = 7.2 Hz), 7.20 (td, 2H, *J* = 7.5 and 1.2 Hz); <sup>13</sup>C NMR (75 MHz, CDCl<sub>3</sub>, δ): 207.2, 173.6, 171.6, 157.3, 157.1, 145.8, 140.3, 134.7, 133.1, 130.3, 129.1, 128.3, 128.2, 127.7, 127.4, 127.0, 126.7, 126.5, 123.7, 122.5, 115.3, 111.6. HRMS: calculated for C<sub>39</sub>H<sub>23</sub>N<sub>3</sub>O<sub>2</sub>: 565.1790, Found: 565.1799. Elemental analysis: calculated for C<sub>39</sub>H<sub>23</sub>N<sub>3</sub>O<sub>2</sub>: C, 82.82; H, 4.10; N, 7.43; O, 5.66, Found: C, 82.83; H, 4.11; N, 7.42.

### 2-(biphenyl-4-yl)-4,6-bis(dibenzo[*b,d*]furan-2-yl)-1,3,5-triazine (DBT2)

2-([1,1'-biphenyl]-4-yl)-4,6-dichloro-1,3,5-triazine (7.0 g, 23.2 mmol), dibenzo[*b,d*]furan-2-ylboronic acid (20.5 g, 69.6 mmol), Pd(PPh<sub>3</sub>)<sub>4</sub> (1.4 g, 1.2 mmol), K<sub>2</sub>CO<sub>3</sub> (9.6 g, 69.6 mmol) were dissolved in 1,4-dioxane/H<sub>2</sub>O (100 mL/20 mL) in a 250-mL single-neck round-bottom flask. The mixture was stirred at reflux for 12 h and cooled to room temperature. This was followed by filtration, and subsequently the crude product was purified by recrystallisation, to obtain **DBT2** as a white powder (10.5 g, yield: 80 %). <sup>1</sup>H NMR (300 MHz, CDCl<sub>3</sub>, δ): 9.46 (d, 2H, *J* = 1.5 Hz), 9.04 (dd, 2H, *J* = 8.7 and 1.8 Hz), 8.94 (d, 2H, *J* = 8.7 Hz), 8.22 (d, 2H, *J* = 7.2 Hz), 7.88 (d, 2H, *J* = 8.7 Hz), 7.79 (d, 2H, *J* = 9.3 Hz), 7.76 (d, 2H, *J* = 6.9 Hz), 7.66 (d,

2H,  $J = 7.8$  Hz), 7.58–7.55 (m, 4H), 7.46 (td, 3H,  $J = 7.5$  and 0.9 Hz);  $^{13}\text{C}$  NMR is not available due to the low solubility. HRMS: calculated for  $\text{C}_{39}\text{H}_{23}\text{N}_3\text{O}_2$ : 565.1790, Found: 565.1798. Elemental analysis: calculated for  $\text{C}_{39}\text{H}_{23}\text{N}_3\text{O}_2$ : C, 82.82; H, 4.10; N, 7.43; O, 5.66, Found: C, 82.81; H, 4.12; N, 7.41.

### **2-(biphenyl-4-yl)-4,6-bis(dibenzo[*b,d*]furan-3-yl)-1,3,5-triazine (DBT3)**

2-([1,1'-biphenyl]-4-yl)-4,6-dichloro-1,3,5-triazine (7.0 g, 23.2 mmol), dibenzo[*b,d*]furan-3-ylboronic acid (20.5 g, 69.6 mmol),  $\text{Pd}(\text{PPh}_3)_4$  (1.4 g, 1.2 mmol),  $\text{K}_2\text{CO}_3$  (9.6 g, 69.6 mmol) were dissolved in 1,4-dioxane/ $\text{H}_2\text{O}$  (100 mL/20 mL) in a 250-mL single-neck round-bottom flask. The mixture was stirred at reflux for 24 h and cooled to room temperature. This was followed by filtration, and subsequently the crude product was purified by recrystallisation, to obtain **DBT3** as a white powder (9.8 g, yield: 75 %).  $^1\text{H}$  NMR (300 MHz,  $\text{CDCl}_3$ ,  $\delta$ ): 9.06 (d, 2H,  $J = 0.9$  Hz), 8.93–8.86 (m, 4H), 8.15 (d, 2H,  $J = 8.7$  Hz), 8.07 (d, 2H,  $J = 6.9$  Hz), 7.85 (d, 2H,  $J = 8.4$  Hz), 7.74 (d, 2H,  $J = 7.8$  Hz), 7.67 (d, 2H,  $J = 8.1$  Hz), 7.58–7.50 (m, 4H), 7.46–7.39 (m, 3H);  $^{13}\text{C}$  NMR (75 MHz,  $\text{CDCl}_3$ ,  $\delta$ ): 171.6, 157.6, 156.6, 135.6, 135.2, 130.5, 129.7, 129.1, 128.4, 128.2, 127.7, 127.5, 127.4, 123.9, 123.8, 123.2, 121.5, 121.7, 117.2, 112.5, 112.2. HRMS: calculated for  $\text{C}_{39}\text{H}_{23}\text{N}_3\text{O}_2$ : 565.1790, Found: 565.1799. Elemental analysis: calculated for  $\text{C}_{39}\text{H}_{23}\text{N}_3\text{O}_2$ : C, 82.82; H, 4.10; N, 7.43; O, 5.66, Found: C, 82.83; H, 4.11; N, 7.42.

### **2-(biphenyl-4-yl)-4,6-bis(dibenzo[*b,d*]furan-4-yl)-1,3,5-triazine (DBT4)**

2-([1,1'-biphenyl]-4-yl)-4,6-dichloro-1,3,5-triazine (7.0 g, 23.2 mmol), dibenzo[*b,d*]furan-4-ylboronic acid (20.5 g, 69.6 mmol),  $\text{Pd}(\text{PPh}_3)_4$  (1.4 g, 1.2 mmol),  $\text{K}_2\text{CO}_3$  (9.6 g, 69.6 mmol) were dissolved in 1,4-dioxane/ $\text{H}_2\text{O}$  (100 mL/20 mL) in a 250-mL single-neck round-bottom flask. The mixture was stirred at reflux for 24 h and cooled to room temperature. This was followed by filtration, and subsequently the crude product was purified by recrystallisation, to

obtain **DBT4** as a white powder (9.5 g, Yield: 72 %).  $^1\text{H}$  NMR (300 MHz,  $\text{CDCl}_3$ ,  $\delta$ ): 9.06 (d, 2H,  $J = 8.4$  Hz), 8.96 (dd, 2H,  $J = 7.8$  and 1.5), 8.26 (dd, 2H,  $J = 7.5$  and 1.2), 8.07 (d, 2H,  $J = 7.8$ ), 7.91 (d, 2H,  $J = 8.4$ ), 7.82 (d, 2H,  $J = 8.4$ ), 7.77 (d, 2H,  $J = 7.2$ ), 7.63 (t, 2H,  $J = 7.8$ ), 7.55–7.51 (m, 4H), 7.47–7.42 (m, 3H);  $^{13}\text{C}$  NMR is not available due to the low solubility. HRMS: calculated for  $\text{C}_{39}\text{H}_{23}\text{N}_3\text{O}_2$ : 565.1790, Found: 565.1798. Elemental analysis: calculated for  $\text{C}_{39}\text{H}_{23}\text{N}_3\text{O}_2$ : C, 82.82; H, 4.10; N, 7.43; O, 5.66, Found: C, 82.81; H, 4.11; N, 7.41.

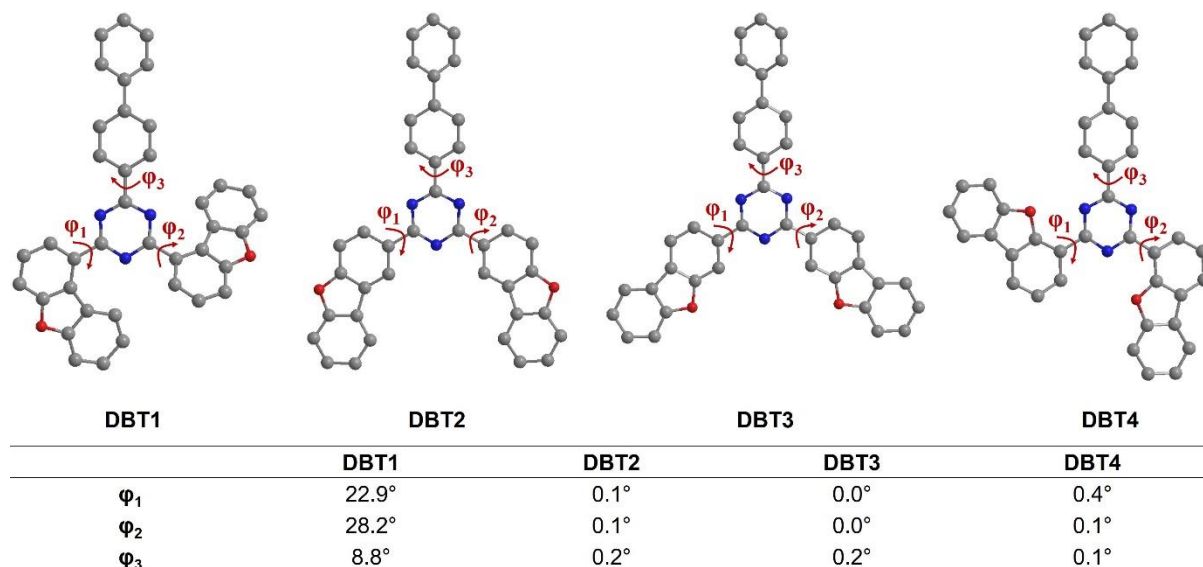

**Figure S1.** Optimised structures and dihedral angles for **DBT1–DBT4** using *Gaussian16* program.

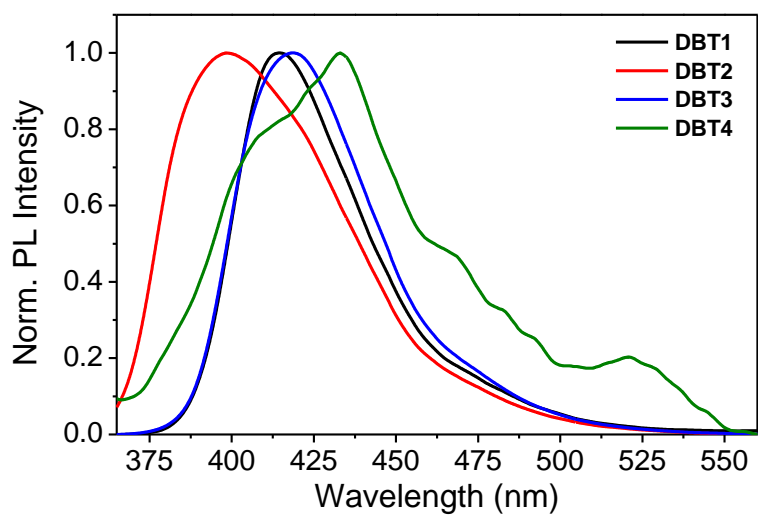

**Figure S2.** PL spectra of **DBT1–DBT4** in film state.

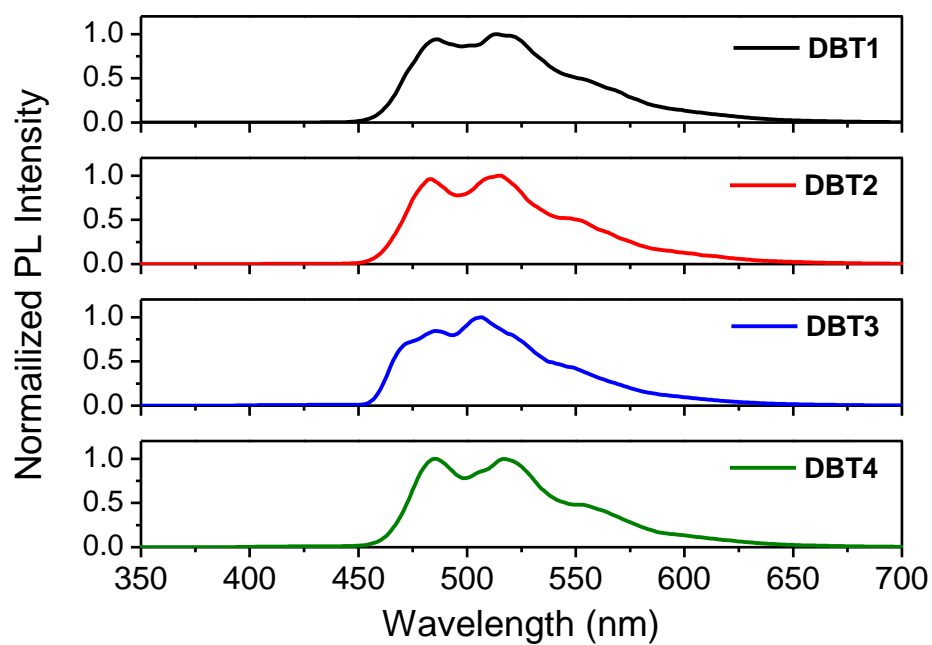

**Figure S3.** Photoluminescence spectra of **DBT1–DBT4** in 2-MeTHF at 77 K.

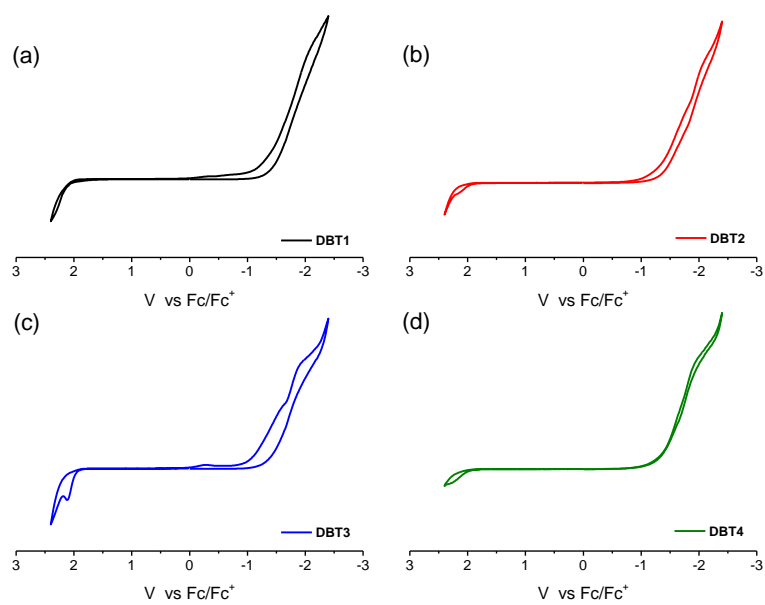

**Figure S4.** CV curves of **DBT1–DBT4** in dichloromethane solution containing 0.1 M *n*-Bu<sub>4</sub>PF<sub>6</sub> as an electrolyte, at a scan rate of 0.1 V s<sup>-1</sup>.

**Table S1.** Photophysical properties of the materials used in device.

| Materials            | Abs. (nm) | Em. (nm) | HOMO (eV) | LUMO (eV) | Band gap (eV) | T <sub>1</sub> (eV) |
|----------------------|-----------|----------|-----------|-----------|---------------|---------------------|
| HAT-CN               | –         | –        | –9.0      | –5.1      | 3.9           | –                   |
| BPBPA                | 353       | 414      | –5.5      | –2.4      | 3.1           | 2.39                |
| 3DF                  | 355       | 440      | –5.1      | –2.0      | 3.1           | 2.46                |
| BPCz                 | 253       | 407      | –5.3      | –1.9      | 3.4           | 2.71                |
| Ir(mdp) <sub>3</sub> | 292       | 527      | –4.9      | –2.6      | 2.3           | 2.35                |
| LG201                | –         | –        | –5.6      | –2.6      | 3.0           | < 2.00              |

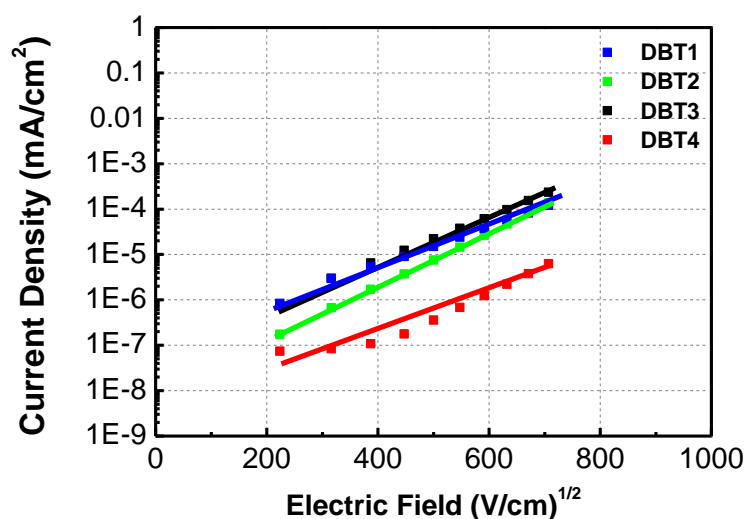

**Figure S5.** Electrical measurements on single-carrier devices. The devices were fabricated with the following structure: ITO/Mg(150 Å)/Host(2000 Å)/Yb/Mg(200 Å). The J–V characteristics were fitted to SCLC with field-dependent mobility.  $J = (9/8) \varepsilon_0 \varepsilon_r (E^2/L) \mu_0 \exp(0.89) \beta \sqrt{E}$ , where  $J$  is the current density;  $\varepsilon_0 \varepsilon_r$  is the dielectric constant;  $E$  is the electric field;  $L$  is the film thickness;  $\mu_0$  is the zero-field carrier mobility;  $\beta$  is the Poole–Frenkel factor. The values of  $\mu_0$  and  $\beta$  were calculated by assuming that  $\varepsilon_r$  is equal to 3. The field-dependent mobility was calculated using the Poole–Frenkel equation:  $\mu(E) = \mu_0 \exp(\beta \sqrt{E})$ .

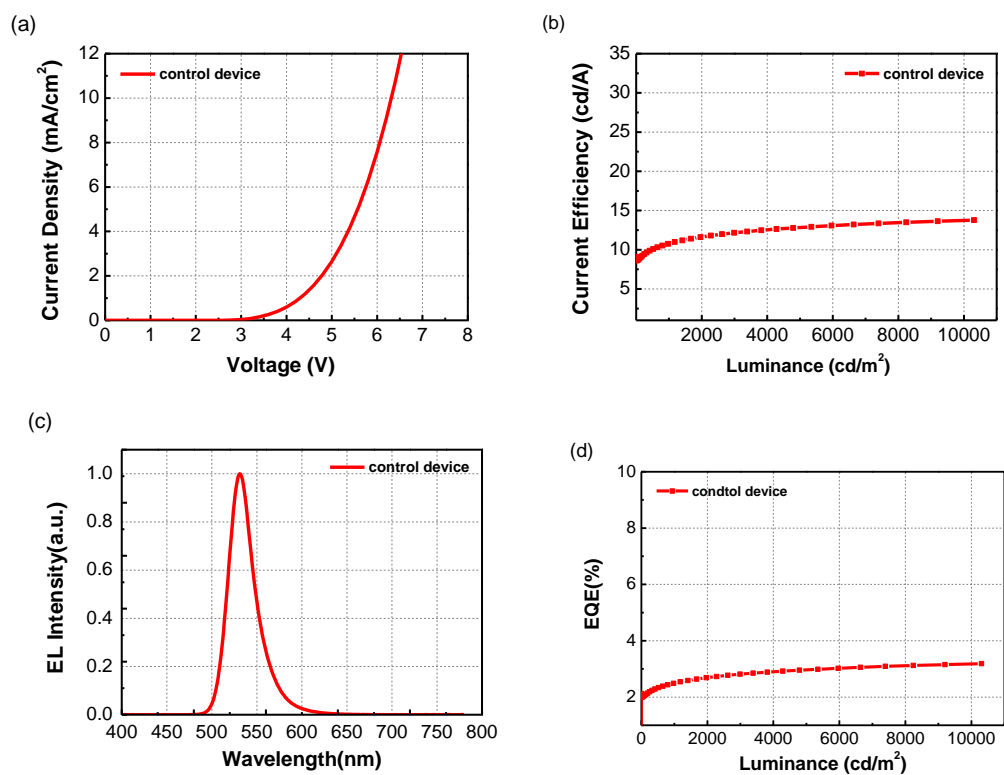

**Figure S6.** Device performance of **control device**. (a) Current density–voltage, (b) current efficiency–luminance, (c) EL spectrum, and (d) EQE–luminance.



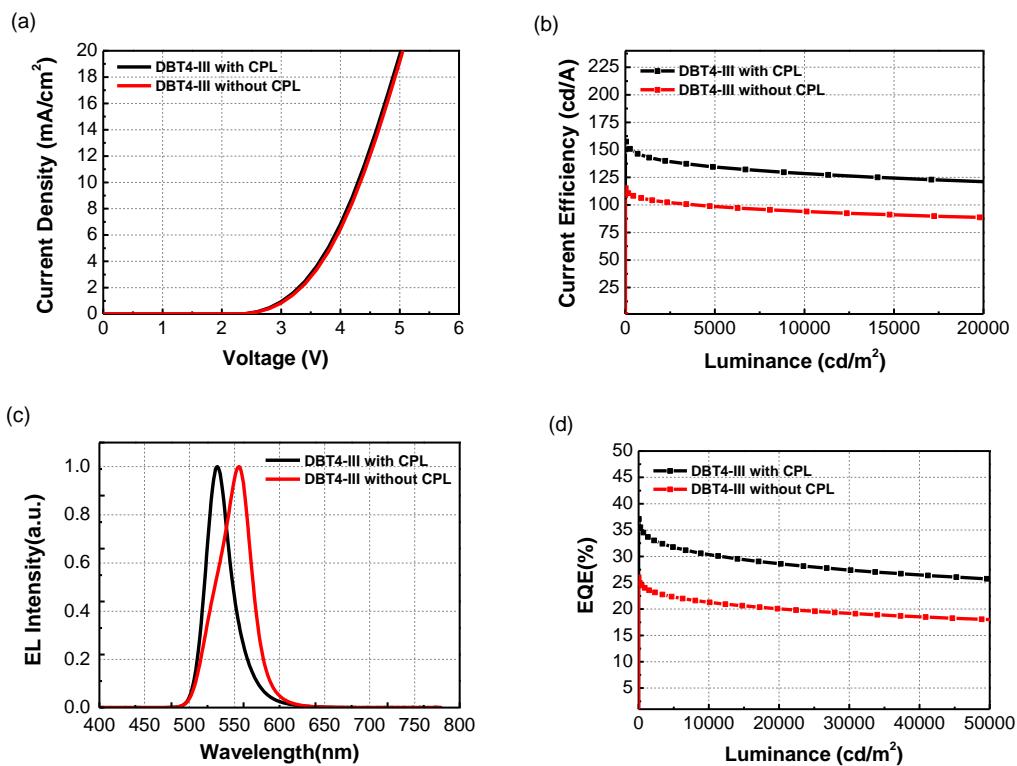

**Figure S7.** Comparison of device performances of **DBT4-III with and without CPL**. (a) Current density–voltage, (b) current efficiency–luminance, (c) EL spectrum, and (d) EQE–luminance.
